# Supplementary material for: Myeloid-derived suppressor cells are associated with impaired Th1 and Th17 responses and severe pulmonary paracoccidioidomycosis which is reversed by anti-Gr1 therapy
Source: PubMed Central journal article supplement (PMC9909482; doi:10.3389/fimmu.2023.1039244), 2023-01-26
Supplement: DataSheet_1.pdf [file DataSheet_1.pdf]

### Supplementary Figure 1

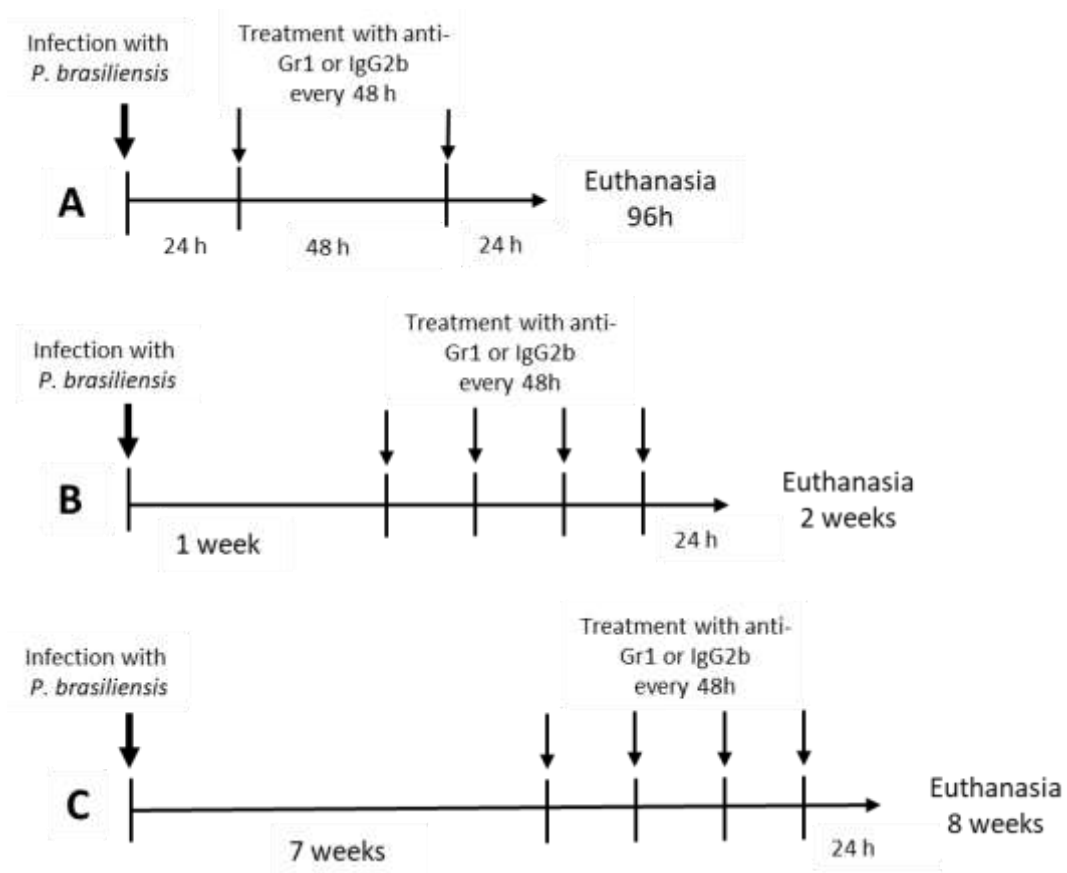

**Supplementary Figure 1.** The diagram illustrates the anti-Gr1 treatments used to analyze the disease severity and the lung infiltrating leukocytes after infection. C57BL/6 WT mice were infected with  $1 \times 10^6$  *P. brasiliensis* yeast cells. After 24 h, 1 week, and 7 weeks of infection, a group of mice received intraperitoneal injections of anti-Gr1 antibody, or rat IgG2b isotype control antibody (200  $\mu\text{g}/\text{dose}$ ). Injections were administered every 48 h. After 96 h, 2 weeks, and 8 weeks of infection, the mice were euthanized. The lung, liver, and spleen were collected to analyze the disease severity, through evaluation of colony-forming unit (CFU) counts and the levels of cytokines by ELISA. The depletion of MDSCs and other leukocytes in the lungs was monitored using flow cytometric analysis.
